# Supplementary material
Source: Springer Nature journal article supplement (https://www.springermedizin.de/resource/supplementary/13054_2010_8639_MOESM8_ESM.pdf/9732436)

## Lung

flagellin 5 $\mu$ g

0h

1h

3h

IB : cleaved caspase-3

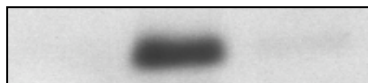

IB : procaspase-3

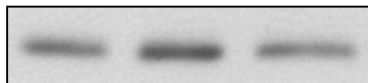

IB : PARP

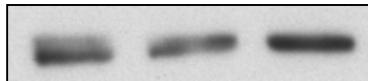

IB : cleaved PARP

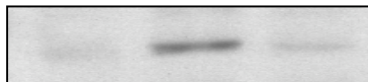

## Liver

flagellin 5 $\mu$ g

0h

1h

3h

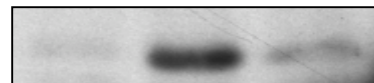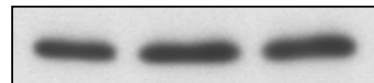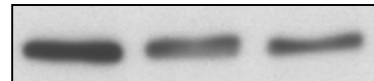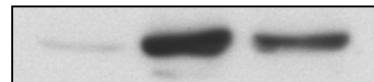

## Gut

flagellin 5 $\mu$ g

0h

1h

3h

IB : cleaved caspase-3

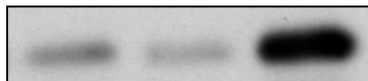

IB : procaspase-3

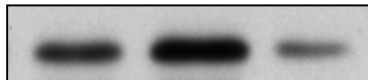

IB : PARP

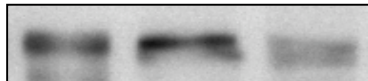

IB : cleaved PARP

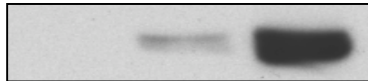

## Kidney

flagellin 5 $\mu$ g

0h

1h

3h

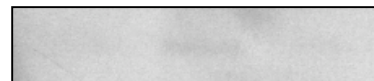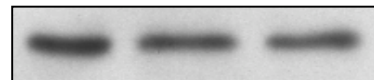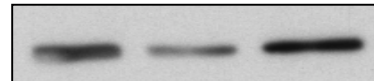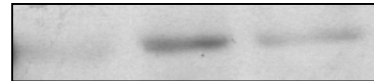

Supplement: MOESM8 [file 9732436]
